# Supplementary material for: Synthesis of aluminium triflate-grafted MCM-41 as a water-tolerant acid catalyst for the ketalization of glycerol with acetone
Source: Royal Society of Chemistry journal article supplement (doi:10.1039/c4cy01396d), 2015-01-01
Supplement: c4cy01396d1.pdf [file c4cy01396d1.pdf]

## Electronic Supplementary Information

### Synthesis of Aluminium Triflate Grafted MCM-41 as Water Tolerant-Acid Catalyst for Ketalization of Glycerol with Acetone

Kamlesh N. Tayade,<sup>a</sup> Manish Mishra,<sup>a,\*</sup> Munusamy K.<sup>b</sup> and Rajesh S. Somani<sup>b</sup>

<sup>a</sup>Department of Chemical Engineering And Shah-Schulman Center for Surface Science and Nanotechnology, Faculty of Technology, Dharmsinh Desai University, College Road, Nadiad – 387 001, Gujarat, India.

Fax: +91 268 2520501; Tel.: +91 268 2520502; E-mail: [manishorgch@gmail.com](mailto:manishorgch@gmail.com).

<sup>b</sup>Discipline of Inorganic Materials and Catalysis, Central Salt and Marine Chemicals Research Institute (CSMCRI), Council of Scientific and Industrial Research (CSIR), GB Marg, Bhavnagar 364002, Gujarat, India.

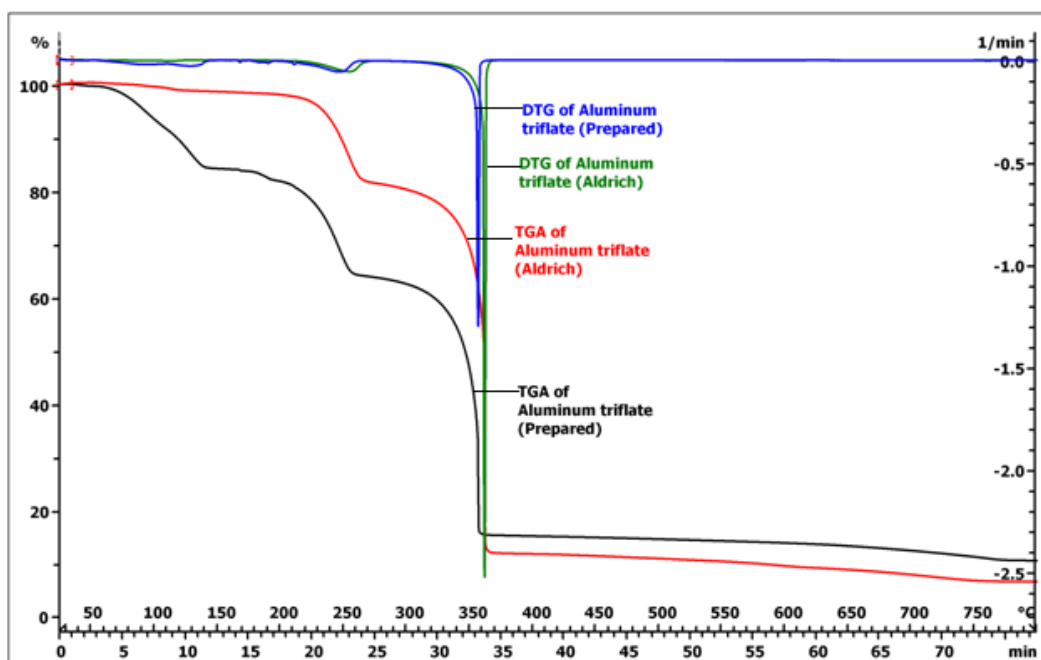

**Figure S1.** TGA and DTG profiles of aluminium triflate prepared in lab (by reaction of aluminium *iso*-propoxide and triflic acid in 1:3 molar ratio in toluene at room temperature), and obtained from Aldrich.
